# Supplementary material
Source: Royal Society of Chemistry journal article supplement (doi:10.1039/d6cp00442c)
Supplement: d6cp00442c1.pdf [file d6cp00442c1.pdf]

Supplementary Information

## NLO-Based Nitrobenzene Sensing Using Defective BN Nanosheets: A DFT Study

Maryam Souri

Department of Chemistry, Payame Noor University, P. O. Box 19395-3697, Tehran, Iran

E-mail addresses: [msouri@pnu.ac.ir](mailto:msouri@pnu.ac.ir)

ORCID ID: [orcid.org/0000-0002-7706-9319](https://orcid.org/0000-0002-7706-9319)

Table S1:  $E_{nanosheet}$  and  $E_{NB\&nanosheet}$  (in a.u.) and adsorption energies (in kcal/mol) in the gas phase, calculated in B3LYP-D3/6-311G(d,p) theoretical level.  $E_{NB}$  is -436.89kcal/mol in this level.

|               | $E_{nanosheet}$ | $E_{NB\&nanosheet}$ | $E_{ad}$ |
|---------------|-----------------|---------------------|----------|
| <b>BN-NB</b>  | -1925.81        | -2362.71            | -7.52    |
| <b>CB-NB</b>  | -1938.88        | -2375.81            | -25.62   |
| <b>CN-NB</b>  | -1909.00        | -2345.91            | -7.85    |
| <b>CBN-NB</b> | -1922.16        | -2359.07            | -13.26   |
| <b>VB-NB</b>  | -1900.55        | -2337.45            | -10.22   |
| <b>VN-NB</b>  | -1870.72        | -2307.64            | -14.72   |

Table S2:  $E_{nanosheet}$  and  $E_{NB\&nanosheet}$  (in a.u.) and adsorption energies (in kcal/mol) in the water environment, calculated in B3LYP-D3/6-311G(d,p) theoretical level.  $E_{NB}$  is -436.90kcal/mol in this level.

|               | $E_{nanosheet}$ | $E_{NB\&nanosheet}$ | $E_{ad}$ |
|---------------|-----------------|---------------------|----------|
| <b>BN-NB</b>  | -1925.82        | -2362.73            | -5.87    |
| <b>CB-NB</b>  | -1938.90        | -2375.84            | -28.09   |
| <b>CN-NB</b>  | -1909.02        | -2345.92            | -6.32    |
| <b>CBN-NB</b> | -1922.18        | -2359.08            | -7.04    |
| <b>VB-NB</b>  | -1900.56        | -2337.47            | -7.34    |
| <b>VN-NB</b>  | -1870.74        | -2307.66            | -18.953  |

Table S3:  $E_{nanosheet}$  and  $E_{NB\&nanosheet}$  (in a.u.) and adsorption energies (in kcal/mol) in the gas phase, calculated in B3LYP/6-311G(d,p) theoretical level.  $E_{NB}$  is -436.86kcal/mol in this level.

|              | $E_{nanosheet}$ | $E_{NB\&nanosheet}$ | $E_{ad}$ |
|--------------|-----------------|---------------------|----------|
| <b>BN-NB</b> | -1925.61        | -2362.48            | -2.86    |
| <b>CB-NB</b> | -1938.69        | -2375.57            | -9.82    |

|               |          |          |       |
|---------------|----------|----------|-------|
| <b>CN-NB</b>  | -1908.81 | -2345.67 | -2.74 |
| <b>CBN-NB</b> | -1921.96 | -2358.83 | -4.90 |
| <b>VB-NB</b>  | -1900.36 | -2337.23 | -2.65 |
| <b>VN-NB</b>  | -1870.53 | -2307.40 | -3.10 |

Table S4:  $E_{nanosheet}$  and  $E_{NB\&nanosheet}$  (in a.u.) and adsorption energies (in kcal/mol) in the water environment, calculated in B3LYP/6-311G(d,p) theoretical level.  $E_{NB}$  is -436.87kcal/mol in this level.

|               | $E_{nanosheet}$ | $E_{NB\&nanosheet}$ | $E_{ad}$ |
|---------------|-----------------|---------------------|----------|
| <b>BN-NB</b>  | -1925.62        | -2362.50            | -2.20    |
| <b>CB-NB</b>  | -1938.70        | -2375.59            | -13.03   |
| <b>CN-NB</b>  | -1908.82        | -2345.69            | -2.05    |
| <b>CBN-NB</b> | -1921.98        | -2358.85            | -2.22    |
| <b>VB-NB</b>  | -1900.37        | -2337.25            | -1.83    |
| <b>VN-NB</b>  | -1870.54        | -2307.42            | -4.08    |
